# Supplementary material for: Asymmetric triply bridged lanthanide binuclear clusters with distinctly different magnetic behaviors
Source: Royal Society of Chemistry journal article supplement (doi:10.1039/d4dt02652g), 2024-01-01
Supplement: d4dt02652g1.pdf [file d4dt02652g1.pdf]

## Electronic Supporting Information

# Asymmetric triply bridged lanthanide binuclear clusters with distinctly different magnetic behaviors

Yue Yang,<sup>a</sup> Yu-Xia Wang,<sup>a,b\*</sup> Yu-Zhe Lei,<sup>a</sup> Peng Cheng<sup>a\*</sup>

<sup>a</sup> Department of Chemistry, Key Laboratory of Advanced Energy Material Chemistry, Frontiers Science Center for New Organic Matter, and Haihe Laboratory of Sustainable Chemical Transformations (Tianjin), College of Chemistry, Nankai University, Tianjin 300071, China.

<sup>b</sup> Tianjin Key Laboratory of Structure and Performance for Functional Molecules, College of Chemistry, Tianjin Normal University, Tianjin 300387, P. R. China Nankai University, Tianjin 300071, China.

\*Corresponding authors:

E-mail: (wangyuxiank@163.com; pcheng@nankai.edu.cn)

## 1. Physical measurements

All materials of the chemicals and solvent reagents are obtained commercially and used in reactions without further purification. Thermogravimetric analysis (TGA) was carried out using a NETZSCH TG 209F3 analyzer. Fourier transform infrared (FTIR) spectra were recorded on a Thermo Scientific Nicolet iS10 spectrophotometer in the range of 400-4000  $\text{cm}^{-1}$ . Powder X-ray diffraction (P-XRD) was measured using the Rigaku Ultima-VI X-ray diffractometer. The measurements of magnetic properties were performed on the Quantum Design MPMS-XL7 ( $\chi_M T$ - $T$ ) and Quantum Design PPMS-VSM. Both the diamagnetic contribution of the sample holder and the diamagnetism estimated using Pascal's constants were corrected.

## 2. Syntheses

The **Dy** samples were synthesized by solvothermal reaction.  $\text{Dy}(\text{NO}_3)_3 \cdot 6\text{H}_2\text{O}$  (0.5 mmol, 228.3 mg) was slowly added to a 15 mL ethanol solution containing  $\text{H}_4\text{L}$  (1.0 mmol, 236.3 mg) and  $\text{PhCOOH}$  (1.5 mmol, 183.2 mg). The mixture was moved to a vial after 0.5 h of stirring. Colorless crystals were obtained under 90 °C solvothermal condition three hours later in a 56% yield (based on Dy). The synthesis method of **Gd** is the same as that of **Dy**, only  $\text{Dy}(\text{NO}_3)_3 \cdot 6\text{H}_2\text{O}$  needs to be replaced with  $\text{Gd}(\text{NO}_3)_3 \cdot 6\text{H}_2\text{O}$ , the crystal color is colorless, and the yield is 41% based on Gd.

## 3. X-Ray crystallography

Single-crystal X-ray data of **Dy** and **Gd** were collected at 120 K on a Rigaku XtaLAB Synergy R, HyPix High-Flux Rotating Anode X-ray Diffractometer equipped with graphite-monochromated  $\text{Cu-K}\alpha$  radiation ( $\lambda = 1.54184 \text{ \AA}$ ). The structures were solved employing direct methods and refined employing the full-matrix least-squares method on  $F^2$  with anisotropic thermal parameters for all nonhydrogen atoms. Hydrogen atoms were added geometrically and refined using a riding model. CCDC: 2383322 and 2383323.

## 4. Structural complement

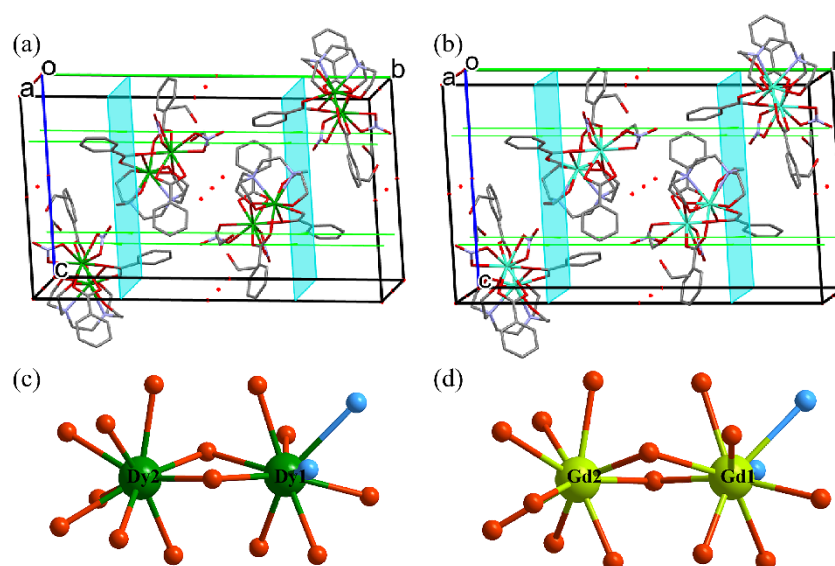

**Fig. S1** Symmetrical elements of **Dy** (a) and **Gd** (b). The blue-green planes represent the glide planes parallel to the (010), the green lines represent the  $2_1$ -screw axes (b-axes), and the red dots represent the inversion centers. Coordination environment of **Dy** (c) and **Gd** (d), red atoms, O; blue atoms, N.

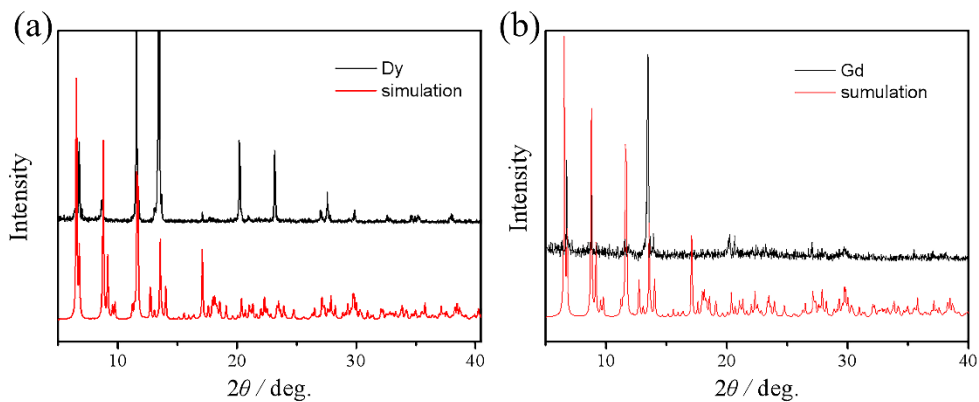

**Fig. S2** Powder-XRD patterns of **Dy** (a) and **Gd** (b), the black lines are the experimental values and the red lines are the simulated values.

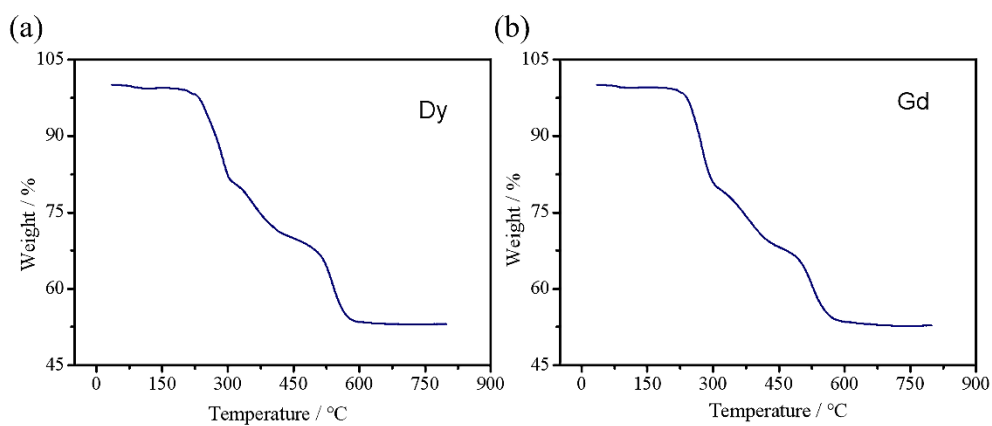

**Fig. S3** TG curves of **Dy** (a) and **Gd** (b).

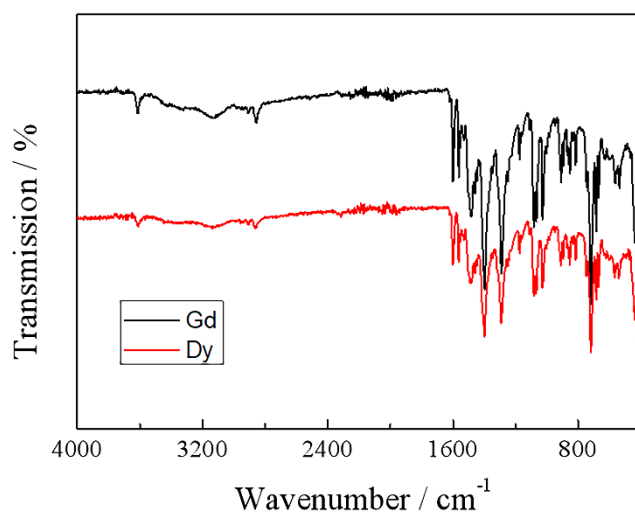

**Fig. S4** Infrared spectral data of **Dy** and **Gd**. The black and red lines represent **Dy** and **Gd**, respectively.

## 5. Magnetic characterization

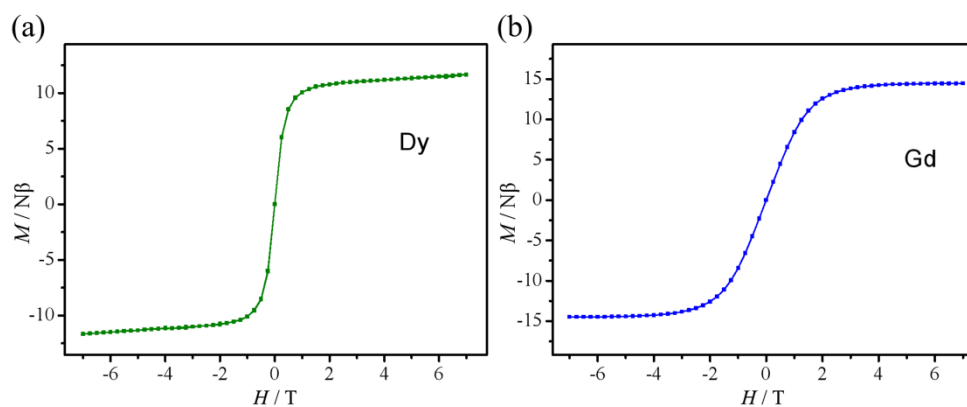

**Fig. S5** Magnetic hysteresis of **Dy** (a) and **Gd** (b) at 2 K.

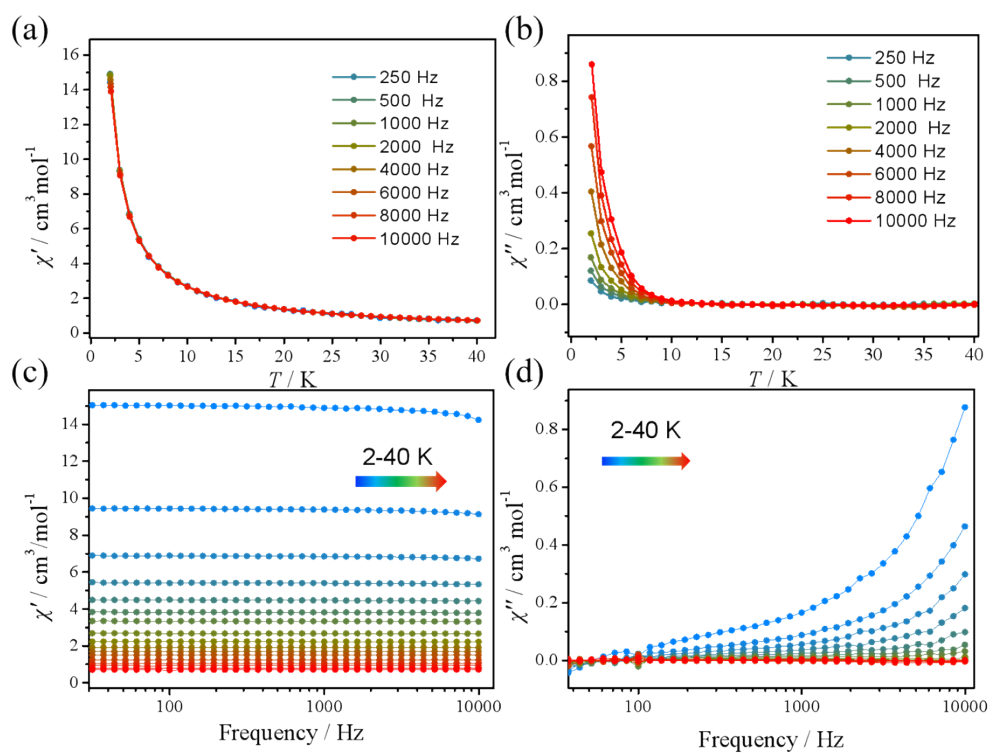

**Fig. S6** AC molar magnetic susceptibility measurements of **Dy**. Temperature (a, b) and frequency (c, d) of the in-phase  $\chi'$  and out-of-phase  $\chi''$  products under a 0 Oe dc field in the temperature range of 2-40 K. Solid lines are guides for the eyes.

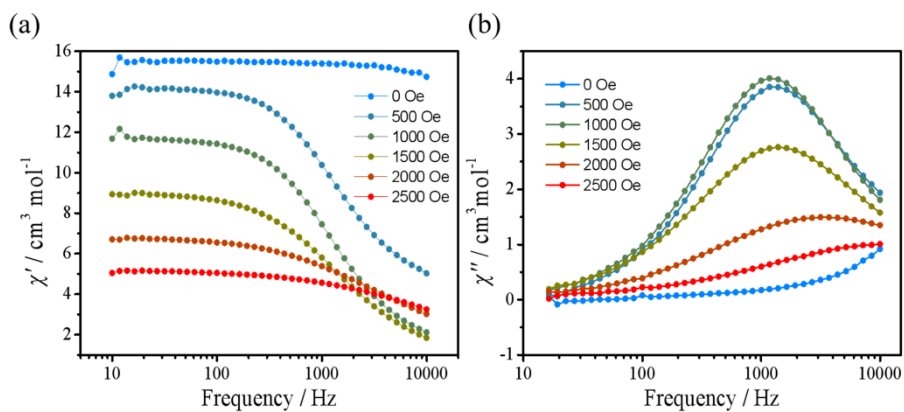

**Fig. S7** Alternating-current molar magnetic susceptibility measurements. Frequency dependence of the in-phase  $\chi'$  (a) and out-of-phase  $\chi''$  (b) products under varying applied dc fields (0-2500 Oe) at 2 K of **Dy**. Solid lines are guides for the eyes.

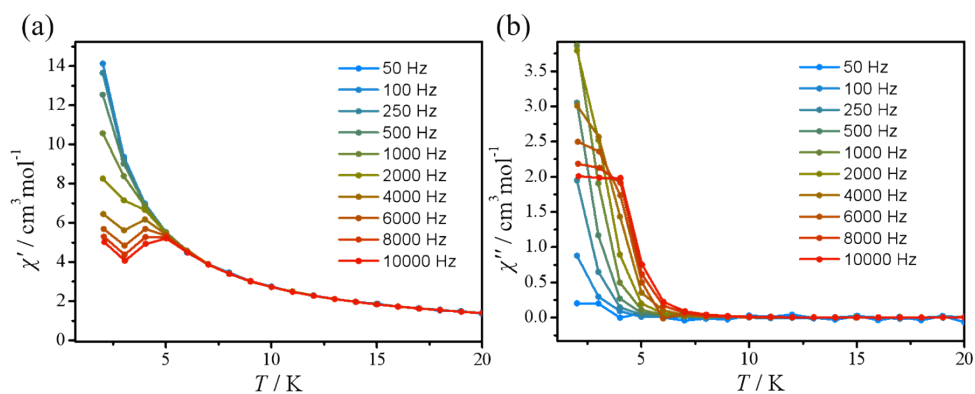

**Fig. S8** Temperature dependence of the in-phase ( $\chi'$ ) and out-of-phase ( $\chi''$ ) ac molar susceptibilities measured on a polycrystalline sample under the 500 Oe field of **Dy**. Solid lines are guides for the eyes.

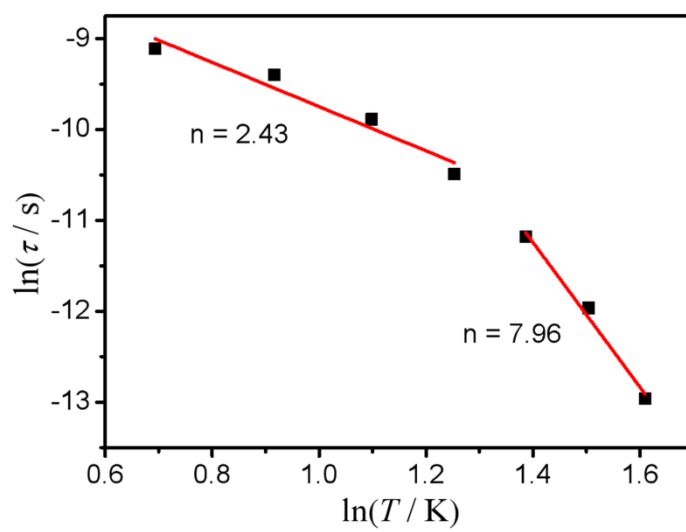

**Fig. S9** Plots of  $\ln(T)$  vs.  $\ln(\tau)$ ; solid red lines represent the best linear fits.

## 6. Table

**Table S1** A part of crystallographic parameters of **Dy** and **Gd**.

| Compound                                    | <b>Dy</b>                                                                                                                          | <b>Gd</b>                                                                                                                          |
|---------------------------------------------|------------------------------------------------------------------------------------------------------------------------------------|------------------------------------------------------------------------------------------------------------------------------------|
| Formular                                    | [Dy <sub>2</sub> (PhCOO) <sub>3</sub> (H <sub>3</sub> L)(NO <sub>3</sub> ) <sub>2</sub> ] $\cdot$ 2C <sub>2</sub> H <sub>5</sub> O | [Gd <sub>2</sub> (PhCOO) <sub>3</sub> (H <sub>3</sub> L)(NO <sub>3</sub> ) <sub>2</sub> ] $\cdot$ 2C <sub>2</sub> H <sub>5</sub> O |
|                                             | H                                                                                                                                  | H                                                                                                                                  |
| <i>T</i> (K)                                | 120                                                                                                                                | 120                                                                                                                                |
| Space group                                 | <i>P</i> 2 <sub>1</sub> / <i>n</i>                                                                                                 | <i>P</i> 2 <sub>1</sub> / <i>n</i>                                                                                                 |
| <i>a</i> (Å)                                | 10.27550(10)                                                                                                                       | 10.3156(2)                                                                                                                         |
| <i>b</i> (Å)                                | 26.0316(2)                                                                                                                         | 26.0237(4)                                                                                                                         |
| <i>c</i> (Å)                                | 16.4282(2)                                                                                                                         | 16.4697(2)                                                                                                                         |
| $\alpha = \gamma$ (deg.)                    | 90                                                                                                                                 | 90                                                                                                                                 |
| $\beta$ (deg.)                              | 105.8520(10)                                                                                                                       | 105.754(2)                                                                                                                         |
| <i>V</i> (Å <sup>3</sup> )                  | 4227.23(8)                                                                                                                         | 4255.21(12)                                                                                                                        |
| <i>Z</i>                                    | 4                                                                                                                                  | 4                                                                                                                                  |
| <i>D</i> <sub>c</sub> (g·cm <sup>-3</sup> ) | 1.791                                                                                                                              | 1.763                                                                                                                              |
| $\mu$ (mm <sup>-1</sup> )                   | 19.374                                                                                                                             | 20.619                                                                                                                             |
| <i>R</i> <sub>int</sub>                     | 0.0397                                                                                                                             | 0.0547                                                                                                                             |
| GOOF                                        | 1.072                                                                                                                              | 1.088                                                                                                                              |
| <i>R</i> <sub>1</sub>                       | 0.0440                                                                                                                             | 0.0463                                                                                                                             |
| w <i>R</i> <sub>2</sub>                     | 0.0944                                                                                                                             | 0.1032                                                                                                                             |
| $\Delta\rho_{\max}$ (e Å <sup>-3</sup> )    | 1.35                                                                                                                               | 1.67                                                                                                                               |
| $\Delta\rho_{\min}$ (e Å <sup>-3</sup> )    | -1.20                                                                                                                              | -1.26                                                                                                                              |

**Table S2** Continuous shape measure calculations for the Dy<sup>3+</sup> ions.

| <b>Dy</b>       |                                   |                                    |        |
|-----------------|-----------------------------------|------------------------------------|--------|
| Dy1             |                                   |                                    |        |
| [ML9]           | JCSAPR-9                          | CSAPR-9                            | MFF-9  |
| Shape           | $C_{4v}$                          | $C_{4v}$                           | $C_s$  |
| Symmetry        | Capped square antiprism J10       | Spherical capped square antiprism  | Muffin |
| Deviation value | 2.409                             | 2.220                              | 2.495  |
| Dy2             |                                   |                                    |        |
| [ML9]           | CSAPR-9                           | TCTPR-9                            | MFF-9  |
| Shape           | $C_{4v}$                          | $D_{3h}$                           | $C_s$  |
| Symmetry        | Spherical capped square antiprism | Spherical tricapped trigonal prism | Muffin |
| Deviation value | 2.132                             | 2.449                              | 2.399  |

**Table S3** Continuous shape measure calculations for the Gd<sup>3+</sup> ions.

| <b>Gd</b>       |                                   |                                    |        |
|-----------------|-----------------------------------|------------------------------------|--------|
| Gd1             |                                   |                                    |        |
| [ML9]           | JCSAPR-9                          | CSAPR-9                            | MFF-9  |
| Shape           | $C_{4v}$                          | $C_{4v}$                           | $C_s$  |
| Symmetry        | Capped square antiprism J10       | Spherical capped square antiprism  | Muffin |
| Deviation value | 2.549                             | 2.331                              | 2.577  |
| Gd 2            |                                   |                                    |        |
| [ML9]           | CSAPR-9                           | TCTPR-9                            | MFF-9  |
| Shape           | $C_{4v}$                          | $D_{3h}$                           | $C_s$  |
| Symmetry        | Spherical capped square antiprism | Spherical tricapped trigonal prism | Muffin |
| Deviation value | 2.334                             | 2.569                              | 2.575  |



**Table S4** The  $-\Delta S_m$  for selected dinuclear Gd<sub>2</sub> clusters.

| Binuclear Gd compounds                                                                                                      | $-\Delta S_m$ (J kg <sup>-1</sup> K <sup>-1</sup> ) | $T$ (K) | $\Delta H$ (T) | Ref.      |
|-----------------------------------------------------------------------------------------------------------------------------|-----------------------------------------------------|---------|----------------|-----------|
| [Gd <sub>2</sub> L <sub>4</sub> (CH <sub>3</sub> COO) <sub>2</sub> (CH <sub>3</sub> OH) <sub>2</sub> ]                      | 39                                                  | 2       | 7              | 43        |
| [Gd <sub>2</sub> (PhCOO) <sub>3</sub> (H <sub>3</sub> L)(NO <sub>3</sub> ) <sub>2</sub> ]·2C <sub>2</sub> H <sub>5</sub> OH | 32.37                                               | 2       | 14             | This work |
| [Gd <sub>2</sub> (PhCOO) <sub>3</sub> (H <sub>3</sub> L)(NO <sub>3</sub> ) <sub>2</sub> ]·2C <sub>2</sub> H <sub>5</sub> OH | 29.44                                               | 2       | 7              | This work |
| [Gd <sub>2</sub> (iba) <sub>6</sub> (bipy) <sub>2</sub> ]                                                                   | 29.3                                                | 2       | 7              | 44        |
| [Gd <sub>2</sub> (nic) <sub>6</sub> (H <sub>2</sub> O) <sub>4</sub> ]                                                       | 27.4                                                | 2.5     | 7              | 44        |
| [Gd <sub>2</sub> (H <sub>3</sub> L) <sub>2</sub> (NO <sub>3</sub> ) <sub>2</sub> ](NO <sub>3</sub> ) <sub>2</sub>           | 27.50                                               | 2       | 7              | 22        |
| [Gd <sub>2</sub> (OAc) <sub>2</sub> (Ph <sub>2</sub> acac) <sub>4</sub> (MeOH) <sub>2</sub> ]                               | 23.7                                                | 2.4     | 7              | 45        |
| [Gd <sub>2</sub> (HFAC) <sub>4</sub> (L1) <sub>2</sub> ]                                                                    | 17.66                                               | 2       | 7              | 46        |
| [Gd <sub>2</sub> (HFAC) <sub>4</sub> (L2) <sub>2</sub> ]                                                                    | 14.81                                               | 3       | 7              | 46        |
| [Gd <sub>2</sub> (tfac) <sub>4</sub> (L) <sub>2</sub> ]                                                                     | 23.23                                               | 2       | 8              | 47        |
| [Gd <sub>2</sub> (hfac) <sub>4</sub> (L) <sub>2</sub> ]                                                                     | 17.05                                               | 2       | 8              | 47        |

**Table S5** Cole-Cole plot fitting parameters for **Dy** in an external field of 500 Oe.

| $T$ (K) | $\chi_s$ (cm <sup>3</sup> mol <sup>-1</sup> ) | $\chi_t$ (cm <sup>3</sup> mol <sup>-1</sup> ) | $\tau$ (s) | $\alpha$ |
|---------|-----------------------------------------------|-----------------------------------------------|------------|----------|
| 2       | 3.94532                                       | 13.4081                                       | 1.10283E-4 | 0.16     |
| 2.5     | 3.22475                                       | 10.589                                        | 8.26235E-5 | 0.14343  |
| 3       | 2.68273                                       | 8.71643                                       | 5.08463E-5 | 0.13387  |
| 3.5     | 2.32571                                       | 7.39668                                       | 2.778E-5   | 0.12061  |
| 4       | 2.07328                                       | 6.41588                                       | 1.39235E-5 | 0.10181  |
| 4.5     | 1.74928                                       | 5.672                                         | 6.35897E-6 | 0.10524  |
| 5       | 0.95711                                       | 5.08107                                       | 2.34359E-6 | 0.13564  |

**Table S6** The best fitting results of the temperature dependent relaxation times.

| $\tau^{-1} = AHT + \tau_{QTM}^{-1} + CT^n + \tau_0^{-1} \exp(-U_{eff}/k_B T)$ |                |
|-------------------------------------------------------------------------------|----------------|
| AH                                                                            | 4292.01        |
| B                                                                             | 0.67518        |
| n                                                                             | 8.20481        |
| $\tau_0$                                                                      | ---            |
| $U_{eff}$ (cm <sup>-1</sup> )                                                 | ---            |
| dominated relaxation processes                                                | Direct + Raman |
